# Supplementary material for: Classification and mutation prediction based on histopathology H&E images in liver cancer using deep learning
Source: PubMed Central journal article supplement (PMC7280520; doi:10.1038/s41698-020-0120-3), 2020-06-08
Supplement: 41698_2020_120_MOESM1_ESM.pdf [file 41698_2020_120_MOESM1_ESM.pdf]

## Supplementary Figures Legends

Supplementary Figure 1. The distribution of the number of “tiles” per slide.

Supplementary Figure 2. 27 genes where mutated at least 10% of the available liver cancer.

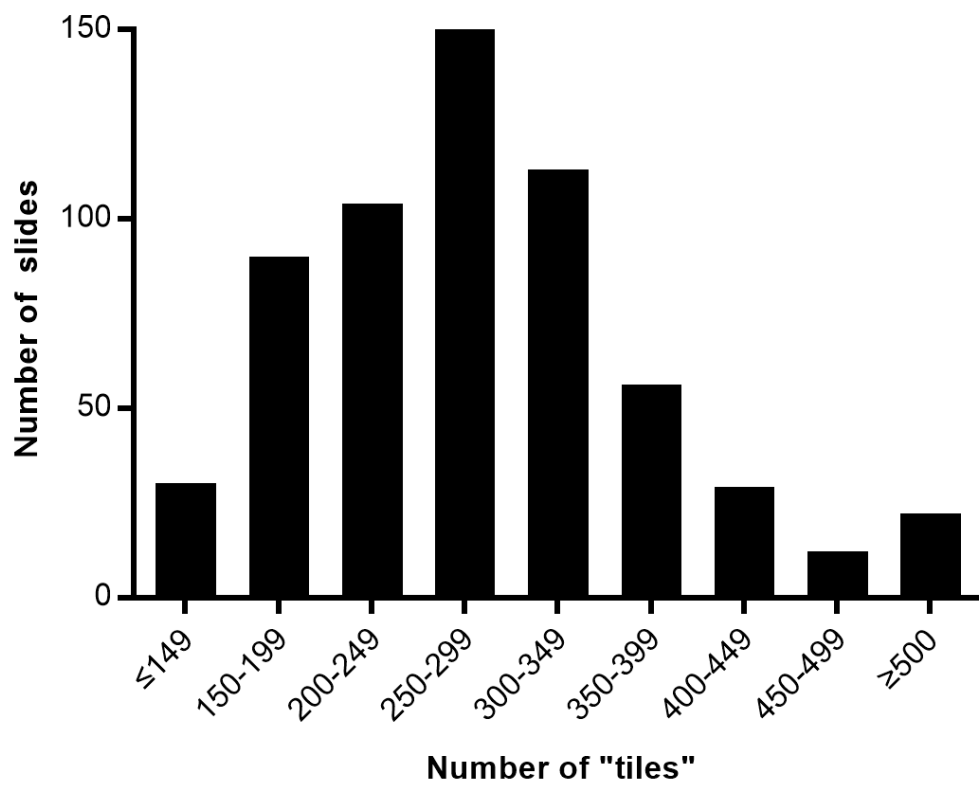

Supplementary Figure 1. The distribution of the number of “tiles” per slide.

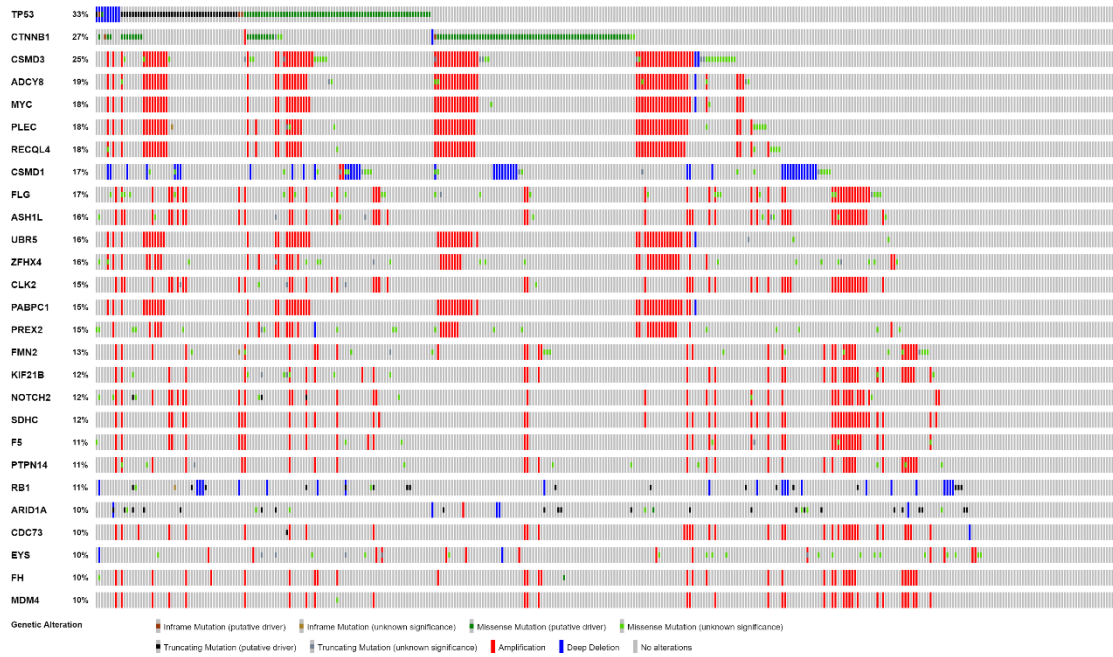

Supplementary Figure 2. 27 genes where mutated at least 10% of the available liver cancer.
